# Supplementary material for: Enhancing Computer Image Recognition with Improved Image Algorithms
Source: Research Square preprint supplement (doi:10.21203/rs.3.rs-4185579/v1), 2024-04-23
Supplement: Supplementary file 1 [file 4283ed390de6945150b8642b.xlsx]

## Sheet: Sheet1
Batch Size	Accuracy	Precision	Recall	Fl Score
24	0.303	0.2946	0.303	0.2988
32	0.5128	0.4136	0.5146	0.5146
40	0.505	0.505	0.505	0.505
48	0.6379	0.6553	0.6453	0.6502
56	0.551	0.6025	0.551	0.5755
64	0.4661	0.4652	0.4661	0.4657
72	0.5572	0.564	0.5483	0.556

## Sheet: Sheet6
Batch Size	Accuracy	Precision	Recall	Fl Score
16	0.5765	0.4823	0.2515	0.3669
24	0.6814	0.4568	0.4823	0.46955
32	0.6925	0.4175	0.2925	0.355
40	0.74395	0.66265	0.54765	0.60515
48	0.7305	0.55125	0.4355	0.493375
56	0.69805	0.4826	0.35805	0.420325
64	0.7036	0.532	0.36415	0.448075
72	0.7407	0.56	0.441	0.492

## Sheet: Sheet2
Image size	100*100	200*200	300*300	400*400	500*500	600*600
Refinement process/s	0.39	1.26	2.76	4.83	7.48	10.67
Whole process/s	0.48	1.39	2.96	5.11	7.86	11.21
Percentage/%	80.85	91.49	94.42	95.41	96.19	96.09

## Sheet: Sheet4
NET		ResNet34
x	y	x	y
0.996461	0.826954
1.00473			0.672979
1.17875	2.53518
1.20924	0.826954
1.20623	3.12597
1.20924			2.55067
1.21155			0.672979
1.32458			3.59501
1.34552			2.54795
1.50391	3.5061
1.6038			3.68575
1.61884	5.96558
1.7213			5.62789
1.7896	5.95245
1.8334			6.26455
1.9936	7.08557
2.13888			6.47179
2.14423	6.74054
2.1689			7.0504
2.22562			6.84905
2.28872	7.31847
2.30185	6.95069
2.57768	7.31847
2.60395	7.58116
2.85284			7.68535
2.95737	7.98195
3.0374	7.60743
3.15282	8.01685
3.1249	8.31002
3.32881			7.86237
3.33579			7.60409
3.23659	8.31002
3.5856	8.36587
3.39015	8.18438
3.60104			7.86237
3.60802			7.59013
3.71971			7.59013
3.72669			8.15615
3.9416	8.41473		8.41473
3.94816			8.13864
4.03235	8.64508
4.34646	8.70791
4.49982			8.41473
4.50066			8.10767
4.77264			8.41473
4.77309			8.10992
5.20505	8.71489
5.21901	8.81959
5.76974	8.82293
5.95294	9.0336
6.60785	8.91453
6.61243	9.04276
7.09789	8.942
7.11163	8.80461
8.93154			8.41473
8.94775			8.08277
9.10385	8.79545
9.11301	8.92827
9.40369	8.92479
9.4107	9.01528
10.7938	8.9649
10.9218	9.10379
12.9967	8.98174
13.1188	9.16481
16.5972	9.25635
17.3037			8.13116
17.3107			8.41473
18.0646			8.41473
18.0646			8.66166
22.3337	9.07327
22.4152			8.70233

## Sheet: Sheet3
Network structure	Params	Accuracy (%)
ResNet34	0.48M	87.2
Net	0.37M	92.1

## Sheet: Sheet5
Image size	100*100	200*200	300*300	400*400	500*500	600*600
Refinement process/s	0.39	1.26	2.76	4.83	7.48	10.67
Whole process/s	0.48	1.39	2.96	5.11	7.86	11.21
Percentage/%	80.85	91.49	94.42	95.41	96.19	96.09

## Sheet: Sheet7
	The mean of the statistic	Variance	Number of trials
First group	32.7	252.14	400
Second Group	34.9	284.76	400
Overall average	33.8	268.35	800
